# Supplementary material
Source: publisher figshare collection journal article supplement (https://sage.figshare.com/ndownloader/files/22660349)

## Appendix A

### Ultrasound for Appendicitis: Assessing the protocol

#### Data Collection Sheet

##### *PACS data*

1. Appendix visualized? 1/0
2. Primary signs of appendicitis? 1/0
3. Secondary signs of appendicitis? 1/0
4. Alternative findings? 1/0
5. Brief summary of alternative findings
6. Length of scan in minutes
7. Presence of focal RLQ tenderness

##### *ER data*

1. Age in years
2. Sex M/F
3. Chief complaint
4. WBC's (if available)
5. Pain Score (if available)
6. Deviation from algorithm? 1/0
7. Further imaging? 1/0
8. Referral? 1/0
9. Admittance? 1/0
10. Meds Alteration? 1/0
11. Surgical Consult? 1/0

## Appendix B

| ULTRASOUND TECHNOLOGIST OBSERVATION FORM<br>ABDOMEN and PELVIC EXAMINATION<br><b>THIS IS NOT A RADIOLOGIST REPORT</b> |                                                                                                                                                                                                                                                                                                                                                                                                                                                                                                                                                                                                                                                                                                                                                                                                                                                                                                                                                                                                                                                                                         |                          | PATIENT ID:<br>DATE:              |  |  |                              |     |    |           |  |                          |                          |                          |                                                  |  |  |  |                                             |                          |                          |                          |                                         |                          |                          |                          |                                                    |  |  |  |                            |                          |                          |                          |                               |                          |                          |                          |
|-----------------------------------------------------------------------------------------------------------------------|-----------------------------------------------------------------------------------------------------------------------------------------------------------------------------------------------------------------------------------------------------------------------------------------------------------------------------------------------------------------------------------------------------------------------------------------------------------------------------------------------------------------------------------------------------------------------------------------------------------------------------------------------------------------------------------------------------------------------------------------------------------------------------------------------------------------------------------------------------------------------------------------------------------------------------------------------------------------------------------------------------------------------------------------------------------------------------------------|--------------------------|-----------------------------------|--|--|------------------------------|-----|----|-----------|--|--------------------------|--------------------------|--------------------------|--------------------------------------------------|--|--|--|---------------------------------------------|--------------------------|--------------------------|--------------------------|-----------------------------------------|--------------------------|--------------------------|--------------------------|----------------------------------------------------|--|--|--|----------------------------|--------------------------|--------------------------|--------------------------|-------------------------------|--------------------------|--------------------------|--------------------------|
|                                                                                                                       | Normal                                                                                                                                                                                                                                                                                                                                                                                                                                                                                                                                                                                                                                                                                                                                                                                                                                                                                                                                                                                                                                                                                  | Poorly visualized        | Comments                          |  |  |                              |     |    |           |  |                          |                          |                          |                                                  |  |  |  |                                             |                          |                          |                          |                                         |                          |                          |                          |                                                    |  |  |  |                            |                          |                          |                          |                               |                          |                          |                          |
| Liver                                                                                                                 |                                                                                                                                                                                                                                                                                                                                                                                                                                                                                                                                                                                                                                                                                                                                                                                                                                                                                                                                                                                                                                                                                         |                          | Length      cm                    |  |  |                              |     |    |           |  |                          |                          |                          |                                                  |  |  |  |                                             |                          |                          |                          |                                         |                          |                          |                          |                                                    |  |  |  |                            |                          |                          |                          |                               |                          |                          |                          |
| IHD/CBD                                                                                                               |                                                                                                                                                                                                                                                                                                                                                                                                                                                                                                                                                                                                                                                                                                                                                                                                                                                                                                                                                                                                                                                                                         |                          | Width      mm                     |  |  |                              |     |    |           |  |                          |                          |                          |                                                  |  |  |  |                                             |                          |                          |                          |                                         |                          |                          |                          |                                                    |  |  |  |                            |                          |                          |                          |                               |                          |                          |                          |
| Gallbladder                                                                                                           |                                                                                                                                                                                                                                                                                                                                                                                                                                                                                                                                                                                                                                                                                                                                                                                                                                                                                                                                                                                                                                                                                         |                          |                                   |  |  |                              |     |    |           |  |                          |                          |                          |                                                  |  |  |  |                                             |                          |                          |                          |                                         |                          |                          |                          |                                                    |  |  |  |                            |                          |                          |                          |                               |                          |                          |                          |
| Pancreas                                                                                                              |                                                                                                                                                                                                                                                                                                                                                                                                                                                                                                                                                                                                                                                                                                                                                                                                                                                                                                                                                                                                                                                                                         |                          |                                   |  |  |                              |     |    |           |  |                          |                          |                          |                                                  |  |  |  |                                             |                          |                          |                          |                                         |                          |                          |                          |                                                    |  |  |  |                            |                          |                          |                          |                               |                          |                          |                          |
| Spleen                                                                                                                |                                                                                                                                                                                                                                                                                                                                                                                                                                                                                                                                                                                                                                                                                                                                                                                                                                                                                                                                                                                                                                                                                         |                          | Length      cm                    |  |  |                              |     |    |           |  |                          |                          |                          |                                                  |  |  |  |                                             |                          |                          |                          |                                         |                          |                          |                          |                                                    |  |  |  |                            |                          |                          |                          |                               |                          |                          |                          |
| Aorta                                                                                                                 |                                                                                                                                                                                                                                                                                                                                                                                                                                                                                                                                                                                                                                                                                                                                                                                                                                                                                                                                                                                                                                                                                         |                          |                                   |  |  |                              |     |    |           |  |                          |                          |                          |                                                  |  |  |  |                                             |                          |                          |                          |                                         |                          |                          |                          |                                                    |  |  |  |                            |                          |                          |                          |                               |                          |                          |                          |
| Nodes                                                                                                                 |                                                                                                                                                                                                                                                                                                                                                                                                                                                                                                                                                                                                                                                                                                                                                                                                                                                                                                                                                                                                                                                                                         |                          |                                   |  |  |                              |     |    |           |  |                          |                          |                          |                                                  |  |  |  |                                             |                          |                          |                          |                                         |                          |                          |                          |                                                    |  |  |  |                            |                          |                          |                          |                               |                          |                          |                          |
| SMA/SMV                                                                                                               |                                                                                                                                                                                                                                                                                                                                                                                                                                                                                                                                                                                                                                                                                                                                                                                                                                                                                                                                                                                                                                                                                         |                          |                                   |  |  |                              |     |    |           |  |                          |                          |                          |                                                  |  |  |  |                                             |                          |                          |                          |                                         |                          |                          |                          |                                                    |  |  |  |                            |                          |                          |                          |                               |                          |                          |                          |
| Right Kidney                                                                                                          |                                                                                                                                                                                                                                                                                                                                                                                                                                                                                                                                                                                                                                                                                                                                                                                                                                                                                                                                                                                                                                                                                         |                          | Length      cm                    |  |  |                              |     |    |           |  |                          |                          |                          |                                                  |  |  |  |                                             |                          |                          |                          |                                         |                          |                          |                          |                                                    |  |  |  |                            |                          |                          |                          |                               |                          |                          |                          |
| Left Kidney                                                                                                           |                                                                                                                                                                                                                                                                                                                                                                                                                                                                                                                                                                                                                                                                                                                                                                                                                                                                                                                                                                                                                                                                                         |                          | Length      cm                    |  |  |                              |     |    |           |  |                          |                          |                          |                                                  |  |  |  |                                             |                          |                          |                          |                                         |                          |                          |                          |                                                    |  |  |  |                            |                          |                          |                          |                               |                          |                          |                          |
| Bowel                                                                                                                 |                                                                                                                                                                                                                                                                                                                                                                                                                                                                                                                                                                                                                                                                                                                                                                                                                                                                                                                                                                                                                                                                                         |                          |                                   |  |  |                              |     |    |           |  |                          |                          |                          |                                                  |  |  |  |                                             |                          |                          |                          |                                         |                          |                          |                          |                                                    |  |  |  |                            |                          |                          |                          |                               |                          |                          |                          |
| Retroperitoneum                                                                                                       |                                                                                                                                                                                                                                                                                                                                                                                                                                                                                                                                                                                                                                                                                                                                                                                                                                                                                                                                                                                                                                                                                         |                          |                                   |  |  |                              |     |    |           |  |                          |                          |                          |                                                  |  |  |  |                                             |                          |                          |                          |                                         |                          |                          |                          |                                                    |  |  |  |                            |                          |                          |                          |                               |                          |                          |                          |
| Diaphragm                                                                                                             |                                                                                                                                                                                                                                                                                                                                                                                                                                                                                                                                                                                                                                                                                                                                                                                                                                                                                                                                                                                                                                                                                         |                          |                                   |  |  |                              |     |    |           |  |                          |                          |                          |                                                  |  |  |  |                                             |                          |                          |                          |                                         |                          |                          |                          |                                                    |  |  |  |                            |                          |                          |                          |                               |                          |                          |                          |
| Bladder                                                                                                               |                                                                                                                                                                                                                                                                                                                                                                                                                                                                                                                                                                                                                                                                                                                                                                                                                                                                                                                                                                                                                                                                                         |                          |                                   |  |  |                              |     |    |           |  |                          |                          |                          |                                                  |  |  |  |                                             |                          |                          |                          |                                         |                          |                          |                          |                                                    |  |  |  |                            |                          |                          |                          |                               |                          |                          |                          |
| Prostate                                                                                                              |                                                                                                                                                                                                                                                                                                                                                                                                                                                                                                                                                                                                                                                                                                                                                                                                                                                                                                                                                                                                                                                                                         |                          | NA or size:      x      x      cm |  |  |                              |     |    |           |  |                          |                          |                          |                                                  |  |  |  |                                             |                          |                          |                          |                                         |                          |                          |                          |                                                    |  |  |  |                            |                          |                          |                          |                               |                          |                          |                          |
| Uterus                                                                                                                |                                                                                                                                                                                                                                                                                                                                                                                                                                                                                                                                                                                                                                                                                                                                                                                                                                                                                                                                                                                                                                                                                         |                          |                                   |  |  |                              |     |    |           |  |                          |                          |                          |                                                  |  |  |  |                                             |                          |                          |                          |                                         |                          |                          |                          |                                                    |  |  |  |                            |                          |                          |                          |                               |                          |                          |                          |
| Right Ovary                                                                                                           |                                                                                                                                                                                                                                                                                                                                                                                                                                                                                                                                                                                                                                                                                                                                                                                                                                                                                                                                                                                                                                                                                         |                          | NA or size:      x      x      cm |  |  |                              |     |    |           |  |                          |                          |                          |                                                  |  |  |  |                                             |                          |                          |                          |                                         |                          |                          |                          |                                                    |  |  |  |                            |                          |                          |                          |                               |                          |                          |                          |
| Left Ovary                                                                                                            |                                                                                                                                                                                                                                                                                                                                                                                                                                                                                                                                                                                                                                                                                                                                                                                                                                                                                                                                                                                                                                                                                         |                          | NA or size:      x      x      cm |  |  |                              |     |    |           |  |                          |                          |                          |                                                  |  |  |  |                                             |                          |                          |                          |                                         |                          |                          |                          |                                                    |  |  |  |                            |                          |                          |                          |                               |                          |                          |                          |
| Appendix                                                                                                              | <table border="0"> <tr> <td>Was the appendix visualized?</td> <td>YES</td> <td>NO</td> <td>UNCERTAIN</td> </tr> <tr> <td></td> <td><input type="checkbox"/></td> <td><input type="checkbox"/></td> <td><input type="checkbox"/></td> </tr> <tr> <td colspan="4">Were the following <b>primary signs</b> present?</td> </tr> <tr> <td>a. Was there hyperemia of appendiceal wall?</td> <td><input type="checkbox"/></td> <td><input type="checkbox"/></td> <td><input type="checkbox"/></td> </tr> <tr> <td>b. Was the appendiceal wall <math>\geq</math> 7mm?</td> <td><input type="checkbox"/></td> <td><input type="checkbox"/></td> <td><input type="checkbox"/></td> </tr> <tr> <td colspan="4">Were the following <b>secondary signs</b> present?</td> </tr> <tr> <td>a. Was a fecolith present?</td> <td><input type="checkbox"/></td> <td><input type="checkbox"/></td> <td><input type="checkbox"/></td> </tr> <tr> <td>b. Was echogenic fat present?</td> <td><input type="checkbox"/></td> <td><input type="checkbox"/></td> <td><input type="checkbox"/></td> </tr> </table> |                          |                                   |  |  | Was the appendix visualized? | YES | NO | UNCERTAIN |  | <input type="checkbox"/> | <input type="checkbox"/> | <input type="checkbox"/> | Were the following <b>primary signs</b> present? |  |  |  | a. Was there hyperemia of appendiceal wall? | <input type="checkbox"/> | <input type="checkbox"/> | <input type="checkbox"/> | b. Was the appendiceal wall $\geq$ 7mm? | <input type="checkbox"/> | <input type="checkbox"/> | <input type="checkbox"/> | Were the following <b>secondary signs</b> present? |  |  |  | a. Was a fecolith present? | <input type="checkbox"/> | <input type="checkbox"/> | <input type="checkbox"/> | b. Was echogenic fat present? | <input type="checkbox"/> | <input type="checkbox"/> | <input type="checkbox"/> |
| Was the appendix visualized?                                                                                          | YES                                                                                                                                                                                                                                                                                                                                                                                                                                                                                                                                                                                                                                                                                                                                                                                                                                                                                                                                                                                                                                                                                     | NO                       | UNCERTAIN                         |  |  |                              |     |    |           |  |                          |                          |                          |                                                  |  |  |  |                                             |                          |                          |                          |                                         |                          |                          |                          |                                                    |  |  |  |                            |                          |                          |                          |                               |                          |                          |                          |
|                                                                                                                       | <input type="checkbox"/>                                                                                                                                                                                                                                                                                                                                                                                                                                                                                                                                                                                                                                                                                                                                                                                                                                                                                                                                                                                                                                                                | <input type="checkbox"/> | <input type="checkbox"/>          |  |  |                              |     |    |           |  |                          |                          |                          |                                                  |  |  |  |                                             |                          |                          |                          |                                         |                          |                          |                          |                                                    |  |  |  |                            |                          |                          |                          |                               |                          |                          |                          |
| Were the following <b>primary signs</b> present?                                                                      |                                                                                                                                                                                                                                                                                                                                                                                                                                                                                                                                                                                                                                                                                                                                                                                                                                                                                                                                                                                                                                                                                         |                          |                                   |  |  |                              |     |    |           |  |                          |                          |                          |                                                  |  |  |  |                                             |                          |                          |                          |                                         |                          |                          |                          |                                                    |  |  |  |                            |                          |                          |                          |                               |                          |                          |                          |
| a. Was there hyperemia of appendiceal wall?                                                                           | <input type="checkbox"/>                                                                                                                                                                                                                                                                                                                                                                                                                                                                                                                                                                                                                                                                                                                                                                                                                                                                                                                                                                                                                                                                | <input type="checkbox"/> | <input type="checkbox"/>          |  |  |                              |     |    |           |  |                          |                          |                          |                                                  |  |  |  |                                             |                          |                          |                          |                                         |                          |                          |                          |                                                    |  |  |  |                            |                          |                          |                          |                               |                          |                          |                          |
| b. Was the appendiceal wall $\geq$ 7mm?                                                                               | <input type="checkbox"/>                                                                                                                                                                                                                                                                                                                                                                                                                                                                                                                                                                                                                                                                                                                                                                                                                                                                                                                                                                                                                                                                | <input type="checkbox"/> | <input type="checkbox"/>          |  |  |                              |     |    |           |  |                          |                          |                          |                                                  |  |  |  |                                             |                          |                          |                          |                                         |                          |                          |                          |                                                    |  |  |  |                            |                          |                          |                          |                               |                          |                          |                          |
| Were the following <b>secondary signs</b> present?                                                                    |                                                                                                                                                                                                                                                                                                                                                                                                                                                                                                                                                                                                                                                                                                                                                                                                                                                                                                                                                                                                                                                                                         |                          |                                   |  |  |                              |     |    |           |  |                          |                          |                          |                                                  |  |  |  |                                             |                          |                          |                          |                                         |                          |                          |                          |                                                    |  |  |  |                            |                          |                          |                          |                               |                          |                          |                          |
| a. Was a fecolith present?                                                                                            | <input type="checkbox"/>                                                                                                                                                                                                                                                                                                                                                                                                                                                                                                                                                                                                                                                                                                                                                                                                                                                                                                                                                                                                                                                                | <input type="checkbox"/> | <input type="checkbox"/>          |  |  |                              |     |    |           |  |                          |                          |                          |                                                  |  |  |  |                                             |                          |                          |                          |                                         |                          |                          |                          |                                                    |  |  |  |                            |                          |                          |                          |                               |                          |                          |                          |
| b. Was echogenic fat present?                                                                                         | <input type="checkbox"/>                                                                                                                                                                                                                                                                                                                                                                                                                                                                                                                                                                                                                                                                                                                                                                                                                                                                                                                                                                                                                                                                | <input type="checkbox"/> | <input type="checkbox"/>          |  |  |                              |     |    |           |  |                          |                          |                          |                                                  |  |  |  |                                             |                          |                          |                          |                                         |                          |                          |                          |                                                    |  |  |  |                            |                          |                          |                          |                               |                          |                          |                          |

Comments

## Appendix C

Please use the diagram below to combine the ultrasound findings with the patient's WBC to further assess the risk of appendicitis.

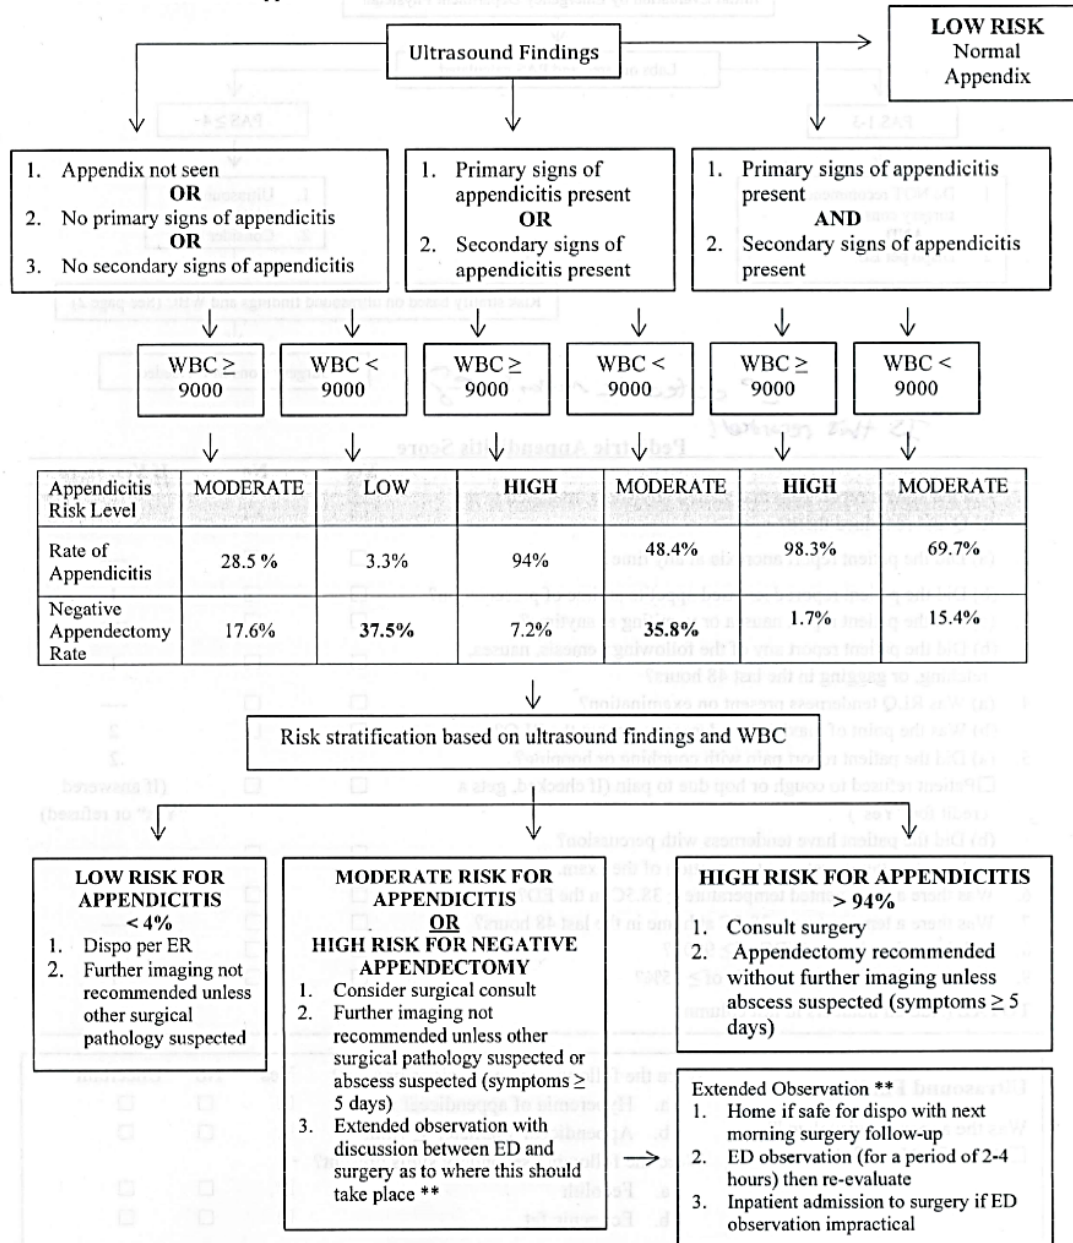

Supplement: Supplementary file 1 [file 22660349]
